# Supplementary material for: Comprehensive analysis of autophagy‐related prognostic genes in breast cancer
Source: PubMed Central journal article supplement (PMC7417718; doi:10.1111/jcmm.15551), 2020-07-02

**Supplementary Figure 1.** The least absolute shrinkage and selection operator (LASSO) algorithms to identify the ARGs signature in the training cohort

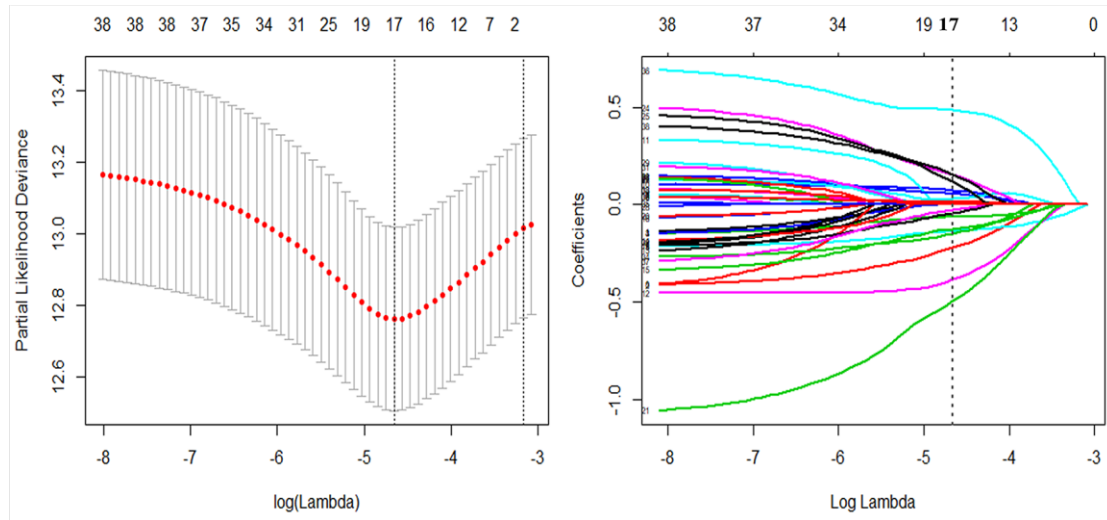

**Supplementary Figure 2.** Functional enrichment analysis of the 17 ARGs in the Metascape database **(A)** The 7 enrichment terms. **(B)** The network of the enrichment terms.

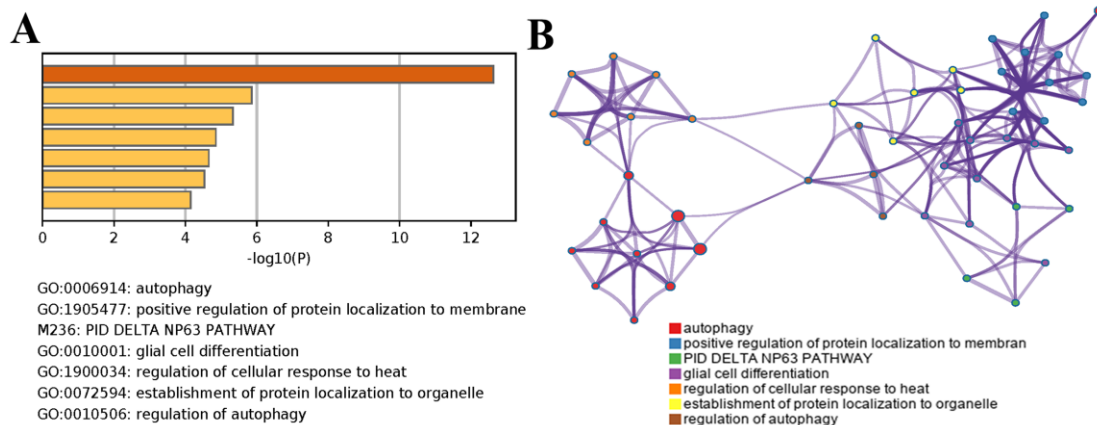

**Supplementary Figure 3.** Genetic alterations of the four ARGs in TCGA database.

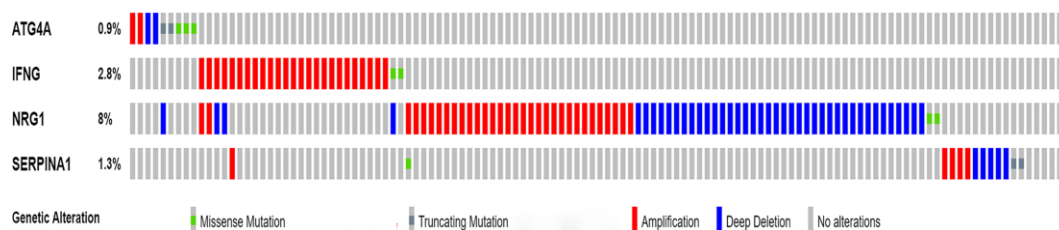

**Supplementary Figure 4.** Visualization of the relationship between the four ARGs and DNA methylation in TCGA database via the MEXPRESS tool

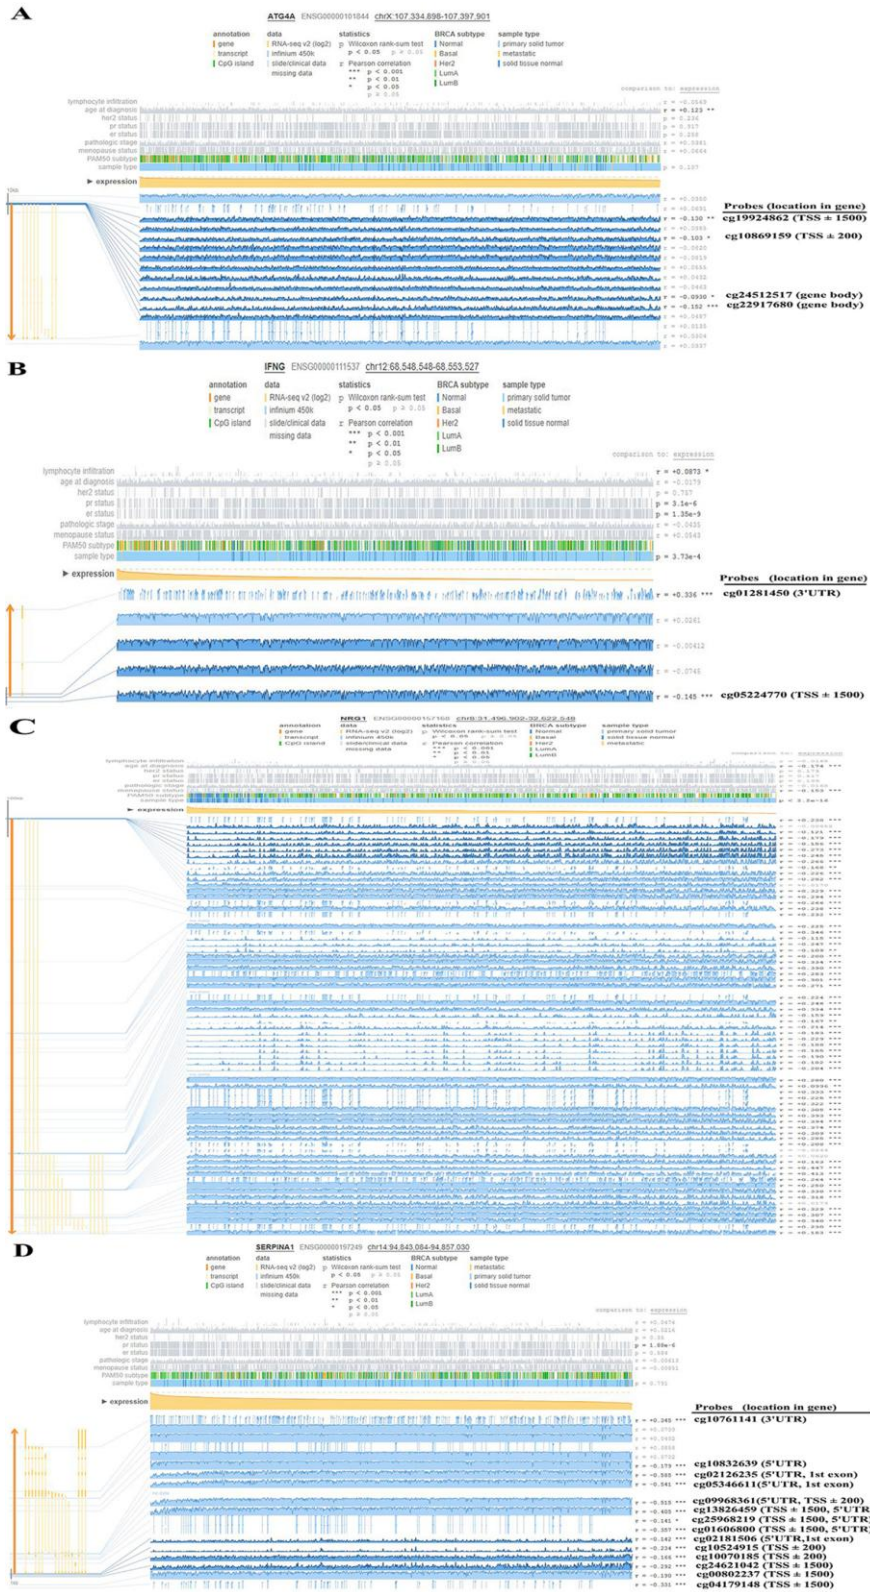

Supplement: JCMM-24-9145-s001.pdf [file JCMM-24-9145-s001.pdf]
